# Supplementary material for: The contribution of comorbidities to mortality in hospitalized patients with heart failure
Source: Springer Nature journal article supplement (doi:10.1007/s00392-018-1210-x), 2018-02-05
Supplement: MOESM4 [file 15441420]

**Table S4:** Medication of patients and controls in the propensity score-matched cohort (values are %)

|  | **HFrEF** | |  | **HFpEF** | |
| --- | --- | --- | --- | --- | --- |
|  |  |  |  |  |  |
|  | **Patients (95% CI)** | **Controls (95% CI)** |  | **Patients (95% CI)** | **Controls (95% CI)** |
|  |  |  |  |  |  |
| **N** | 777 | 3,446 |  | 1,135 | 4,832 |
|  |  |  |  |  |  |
| **Medications** |  |  |  |  |  |
| ACE inhibitors | 59.2 (55.7-62.6) | 57.9 (56.2-59.5) |  | 55.3 (52.4-58.2) | 53.5 (52.1-54.9) |
| Angiotensin II receptor antagonists | 4.9 (3.6- 6.6) | 5.7 (5.0- 6.5) |  | 6.6 (5.3- 8.2) | 6.3 (5.7- 7.1) |
| Beta blocker | 57.3 (53.8-60.7) | 54.6 (52.9-56.2) |  | 56.9 (54.0-59.8) | 54.8 (53.4-56.2) |
| Low-ceiling diuretics | 15.4 (13.1-18.2) | 15.2 (14.0-16.4) |  | 18.4 (16.3-20.8) | 17.9 (16.8-19.0) |
| High-ceiling diuretics | 49.9 (46.4-53.4) | 43.4 (41.8-45.1) |  | 49.6 (46.7-52.5) | 41.4 (40.1-42.8) |
| Cardiac glycosides | 19.4 (16.8-22.4) | 15.2 (14.1-16.5) |  | 18.0 (15.8-20.3) | 12.9 (11.9-13.8) |
| Acetylsalicylic acid | 30.2 (27.1-33.6) | 27.5 (26.0-29.0) |  | 25.4 (22.9-28.0) | 24.1 (22.9-25.3) |
| Clopidogrel | 7.3 (5.7- 9.4) | 6.3 (5.5- 7.1) |  | 5.7 (4.5- 7.2) | 4.9 (4.4- 5.6) |
| Vitamin K antagonists | 20.7 (18.0-23.7) | 17.6 (16.4-18.9) |  | 20.4 (18.1-22.8) | 15.2 (14.2-16.3) |
| HMG-CoA reductase inhibitors | 29.7 (26.6-33.0) | 28.8 (27.3-30.4) |  | 24.2 (21.8-26.8) | 23.3 (22.1-24.5) |
| Potassium-sparing agents | 19.6 (16.9-22.5) | 7.4 (6.6- 8.4) |  | 14.2 (12.3-16.3) | 8.2 (7.4- 9.0) |
|  |  |  |  |  |  |

HFrEF/HFpEF: Heart failure with reduced/preserved ejection fraction, 95% CI: confidence interval
